# Supplementary material for: Identification of Candidate Signature Genes and Key Regulators Associated With Trypanotolerance in the Sheko Breed
Source: Front Genet. 2019 Nov 14;10:1095. doi: 10.3389/fgene.2019.01095 (PMC6872528; doi:10.3389/fgene.2019.01095)
Supplement: Supplementary Table 9 — List of intergenic variants identified by CLR analysis. [file Table_9.xls]

## Sheet: Intergenic variants
SNP	Chr		physical position	rs	consequence	gene_id	transcript_id
ARS-BFGL-BAC-12583			58070117	rs43101493	intergenic_variant	NA	NA
ARS-BFGL-BAC-13039			61700872	rs109362502	intergenic_variant	NA	NA
ARS-BFGL-NGS-101035			58456868	rs110119737	intergenic_variant	NA	NA
ARS-BFGL-NGS-107478			61745935	rs110743319	intergenic_variant	NA	NA
ARS-BFGL-NGS-109240			58428765	rs109983775	intergenic_variant	NA	NA
ARS-BFGL-NGS-113888			48315330	rs110687131	intergenic_variant	NA	NA
ARS-BFGL-NGS-114602			1052840	rs109642715	intergenic_variant	NA	NA
ARS-BFGL-NGS-119375			58140449	rs110025998	intergenic_variant	NA	NA
ARS-BFGL-NGS-119606			49583187	rs110351360	intergenic_variant	NA	NA
ARS-BFGL-NGS-15110			29520358	rs110380883	intergenic_variant	NA	NA
ARS-BFGL-NGS-26724			48514266	rs110164929	intergenic_variant	NA	NA
ARS-BFGL-NGS-34143			38273730	rs109178993	intergenic_variant	NA	NA
ARS-BFGL-NGS-40753			48460111	rs29027133	intergenic_variant	NA	NA
ARS-BFGL-NGS-75350			49734417	rs110536786	intergenic_variant	NA	NA
ARS-BFGL-NGS-81824			49322620	rs109461169	intergenic_variant	NA	NA
BovineHD0300004113			12578099	rs135179596	intergenic_variant	NA	NA
BovineHD0300004118			12608080	rs109505609	intergenic_variant	NA	NA
BovineHD0300035481			12604380	rs135978692	intergenic_variant	NA	NA
BovineHD0400035323			120786530	rs137141806	intergenic_variant	NA	NA
BovineHD0500013933			48254047	rs135307633	intergenic_variant	NA	NA
BovineHD0500013934			48257614	rs136709359	intergenic_variant	NA	NA
BovineHD0500013935			48261851	rs110663264	intergenic_variant	NA	NA
BovineHD0500013936			48262526	rs110230387	intergenic_variant	NA	NA
BovineHD0500013937			48269541	rs132976807	intergenic_variant	NA	NA
BovineHD0500013938			48280390	rs109700945	intergenic_variant	NA	NA
BovineHD0500013939			48281631	rs110327509	intergenic_variant	NA	NA
BovineHD0500013940			48286719	rs133348683	intergenic_variant	NA	NA
BovineHD0500013941			48293714	rs135195426	intergenic_variant	NA	NA
BovineHD0500013942			48301183	rs135828230	intergenic_variant	NA	NA
BovineHD0500013943			48302187	rs136861837	intergenic_variant	NA	NA
BovineHD0500013944			48303561	rs134531861	intergenic_variant	NA	NA
BovineHD0500013945			48306738	rs137748178	intergenic_variant	NA	NA
BovineHD0500013946			48307828	rs133798279	intergenic_variant	NA	NA
BovineHD0500013947			48314411	rs134817862	intergenic_variant	NA	NA
BovineHD0500013948			48316813	rs135726252	intergenic_variant	NA	NA
BovineHD0500013949			48319773	rs133628143	intergenic_variant	NA	NA
BovineHD0500013950			48320651	rs137434828	intergenic_variant	NA	NA
BovineHD0500013951			48323585	rs132978104	intergenic_variant	NA	NA
BovineHD0500013952			48329940	rs137016501	intergenic_variant	NA	NA
BovineHD0500013953			48332258	rs134933798	intergenic_variant	NA	NA
BovineHD0500013955			48336996	rs132793339	intergenic_variant	NA	NA
BovineHD0500013956			48340689	rs110464706	intergenic_variant	NA	NA
BovineHD0500013957			48343189	rs135924369	intergenic_variant	NA	NA
BovineHD0500013958			48345020	rs133172521	intergenic_variant	NA	NA
BovineHD0500013959			48349156	rs110280658	intergenic_variant	NA	NA
BovineHD0500013961			48359365	rs137590642	intergenic_variant	NA	NA
BovineHD0500013962			48360902	rs133405315	intergenic_variant	NA	NA
BovineHD0500013963			48363696	rs109408140	intergenic_variant	NA	NA
BovineHD0500013964			48367480	rs135350275	intergenic_variant	NA	NA
BovineHD0500013965			48370397	rs133179470	intergenic_variant	NA	NA
BovineHD0500013968			48376160	rs109337835	intergenic_variant	NA	NA
BovineHD0500013970			48379521	rs133491036	intergenic_variant	NA	NA
BovineHD0500013971			48381204	rs110914739	intergenic_variant	NA	NA
BovineHD0500013972			48382027	rs137745135	intergenic_variant	NA	NA
BovineHD0500013973			48386341	rs109530977	intergenic_variant	NA	NA
BovineHD0500013974			48387823	rs137491902	intergenic_variant	NA	NA
BovineHD0500013975			48389053	rs136387483	intergenic_variant	NA	NA
BovineHD0500013976			48391478	rs133904497	intergenic_variant	NA	NA
BovineHD0500013977			48395867	rs135763606	intergenic_variant	NA	NA
BovineHD0500013978			48399194	rs132991670	intergenic_variant	NA	NA
BovineHD0500013979			48404060	rs137176596	intergenic_variant	NA	NA
BovineHD0500013980			48409250	rs134928663	intergenic_variant	NA	NA
BovineHD0500013981			48414502	rs136597539	intergenic_variant	NA	NA
BovineHD0500013982			48428283	rs110349953	intergenic_variant	NA	NA
BovineHD0500013984			48431864	rs109376952	intergenic_variant	NA	NA
BovineHD0500013985			48437536	rs133519651	intergenic_variant	NA	NA
BovineHD0500013986			48443617	rs110260357	intergenic_variant	NA	NA
BovineHD0500013987			48450249	rs109211744	intergenic_variant	NA	NA
BovineHD0500013988			48454694	rs133399674	intergenic_variant	NA	NA
BovineHD0500013989			48466051	rs137332402	intergenic_variant	NA	NA
BovineHD0500013990			48468128	rs135975179	intergenic_variant	NA	NA
BovineHD0500013991			48473507	rs136753472	intergenic_variant	NA	NA
BovineHD0500013992			48474678	rs134687478	intergenic_variant	NA	NA
BovineHD0500013993			48477903	rs136498763	intergenic_variant	NA	NA
BovineHD0500013994			48481783	rs134299181	intergenic_variant	NA	NA
BovineHD0500013995			48486638	rs135566493	intergenic_variant	NA	NA
BovineHD0500013996			48487863	rs136439036	intergenic_variant	NA	NA
BovineHD0500013997			48491253	rs133814289	intergenic_variant	NA	NA
BovineHD0500013998			48494942	rs137489630	intergenic_variant	NA	NA
BovineHD0500013999			48496341	rs133148720	intergenic_variant	NA	NA
BovineHD0500014000			48499468	rs136908369	intergenic_variant	NA	NA
BovineHD0500014001			48503033	rs135137500	intergenic_variant	NA	NA
BovineHD0500014002			48506281	rs109764980	intergenic_variant	NA	NA
BovineHD0500014004			48518543	rs109617113	intergenic_variant	NA	NA
BovineHD0500014005			48521028	rs135351569	intergenic_variant	NA	NA
BovineHD0500014006			48525316	rs110045484	intergenic_variant	NA	NA
BovineHD0500014007			48529857	rs110385938	intergenic_variant	NA	NA
BovineHD0500014008			48534582	rs110700894	intergenic_variant	NA	NA
BovineHD0500014009			48541740	rs109589019	intergenic_variant	NA	NA
BovineHD0500014010			48547369	rs110747857	intergenic_variant	NA	NA
BovineHD0500014011			48550862	rs109726458	intergenic_variant	NA	NA
BovineHD0500014012			48555140	rs110517550	intergenic_variant	NA	NA
BovineHD0500014013			48558709	rs135375025	intergenic_variant	NA	NA
BovineHD0500014055			48767206	rs136807897	intergenic_variant	NA	NA
BovineHD0500014073			48853528	rs137373232	intergenic_variant	NA	NA
BovineHD0500014074			48855070	rs132766163	intergenic_variant	NA	NA
BovineHD0500014075			48862995	rs137118965	intergenic_variant	NA	NA
BovineHD0500014076			48869163	rs135836239	intergenic_variant	NA	NA
BovineHD0500014078			48872208	rs109002803	intergenic_variant	NA	NA
BovineHD0500014079			48876680	rs109359891	intergenic_variant	NA	NA
BovineHD0500014081			48888271	rs109653017	intergenic_variant	NA	NA
BovineHD0500014082			48891559	rs110331316	intergenic_variant	NA	NA
BovineHD0500014084			48899851	rs134816370	intergenic_variant	NA	NA
BovineHD0500014085			48901646	rs109621403	intergenic_variant	NA	NA
BovineHD0500014086			48902876	rs133238119	intergenic_variant	NA	NA
BovineHD0500014087			48907986	rs137275070	intergenic_variant	NA	NA
BovineHD0600001421			6510612	rs136709778	intergenic_variant	NA	NA
BovineHD0600001422			6517776	rs134330143	intergenic_variant	NA	NA
BovineHD0800022886			76251702	rs132790651	intergenic_variant	NA	NA
BovineHD0800022887			76255853	rs134301519	intergenic_variant	NA	NA
BovineHD0800022888			76260420	rs42974557	intergenic_variant	NA	NA
BovineHD0800022889			76276595	rs109349050	intergenic_variant	NA	NA
BovineHD0800022890			76279097	rs137272643	intergenic_variant	NA	NA
BovineHD0800022891			76289594	rs136210145	intergenic_variant	NA	NA
BovineHD0800022892			76302844	rs109455802	intergenic_variant	NA	NA
BovineHD0800022893			76309779	rs110685634	intergenic_variant	NA	NA
BovineHD0800022894			76315759	rs136398472	intergenic_variant	NA	NA
BovineHD0800022895			76319321	rs136942750	intergenic_variant	NA	NA
BovineHD0800022896			76323489	rs134756351	intergenic_variant	NA	NA
BovineHD0800022910			76383770	rs135301933	intergenic_variant	NA	NA
BovineHD0800022936			76462198	rs136157267	intergenic_variant	NA	NA
BovineHD0800022943			76490938	rs42931003	intergenic_variant	NA	NA
BovineHD0800022944			76494027	rs42931004	intergenic_variant	NA	NA
BovineHD0800022945			76496946	rs135911398	intergenic_variant	NA	NA
BovineHD0800022946			76500575	rs133160775	intergenic_variant	NA	NA
BovineHD0800022948			76512270	rs134828724	intergenic_variant	NA	NA
BovineHD0800022961			76562256	rs43163091	intergenic_variant	NA	NA
BovineHD0900015717			57508897	rs135341568	intergenic_variant	NA	NA
BovineHD0900015720			57531355	rs43001247	intergenic_variant	NA	NA
BovineHD0900015721			57533101	rs43001246	intergenic_variant	NA	NA
BovineHD0900015722			57557170	rs43603162	intergenic_variant	NA	NA
BovineHD0900015723			57569543	rs43603177	intergenic_variant	NA	NA
BovineHD0900015724			57575294	rs132747131	intergenic_variant	NA	NA
BovineHD0900015725			57579942	rs133533747	intergenic_variant	NA	NA
BovineHD0900015726			57585294	rs43603211	intergenic_variant	NA	NA
BovineHD0900015727			57588923	rs43603213	intergenic_variant	NA	NA
BovineHD0900015728			57597042	rs43603220	intergenic_variant	NA	NA
BovineHD1000011849			38254345	rs109593588	intergenic_variant	NA	NA
BovineHD1000011850			38255901	rs133754939	intergenic_variant	NA	NA
BovineHD1000011851			38262598	rs135242328	intergenic_variant	NA	NA
BovineHD1000011852			38266623	rs132846480	intergenic_variant	NA	NA
BovineHD1000011854			38276824	rs137067175	intergenic_variant	NA	NA
BovineHD1000011855			38277347	rs135918821	intergenic_variant	NA	NA
BovineHD1000011856			38279020	rs110189671	intergenic_variant	NA	NA
BovineHD1000011857			38280704	rs110836795	intergenic_variant	NA	NA
BovineHD1000011858			38282914	rs136079963	intergenic_variant	NA	NA
BovineHD1000011860			38285386	rs110319702	intergenic_variant	NA	NA
BovineHD1000011861			38291372	rs135479866	intergenic_variant	NA	NA
BovineHD1000011862			38296468	rs137640074	intergenic_variant	NA	NA
BovineHD1100014151			48182216	rs110926475	intergenic_variant	NA	NA
BovineHD1100014153			48187604	rs134478297	intergenic_variant	NA	NA
BovineHD1100014444			49105419	rs136967717	intergenic_variant	NA	NA
BovineHD1100014446			49113198	rs110183925	intergenic_variant	NA	NA
BovineHD1100014447			49116274	rs134818217	intergenic_variant	NA	NA
BovineHD1100014448			49123526	rs136334967	intergenic_variant	NA	NA
BovineHD1100014449			49127713	rs136624755	intergenic_variant	NA	NA
BovineHD1100014456			49153562	rs133067759	intergenic_variant	NA	NA
BovineHD1100014462			49179669	rs109156611	intergenic_variant	NA	NA
BovineHD1100014463			49182358	rs109359815	intergenic_variant	NA	NA
BovineHD1100014464			49183053	rs109518720	intergenic_variant	NA	NA
BovineHD1100014483			49272501	rs136488237	intergenic_variant	NA	NA
BovineHD1100014484			49277166	rs108976128	intergenic_variant	NA	NA
BovineHD1100014492			49315174	rs132972667	intergenic_variant	NA	NA
BovineHD1100014493			49328554	rs134273192	intergenic_variant	NA	NA
BovineHD1100014494			49333017	rs109001343	intergenic_variant	NA	NA
BovineHD1100014495			49334719	rs110239531	intergenic_variant	NA	NA
BovineHD1100014496			49339790	rs134446936	intergenic_variant	NA	NA
BovineHD1100014497			49347927	rs109645745	intergenic_variant	NA	NA
BovineHD1100014498			49352635	rs133393716	intergenic_variant	NA	NA
BovineHD1100014499			49356048	rs135007425	intergenic_variant	NA	NA
BovineHD1100014500			49361395	rs136399464	intergenic_variant	NA	NA
BovineHD1100014501			49370261	rs133690898	intergenic_variant	NA	NA
BovineHD1100014502			49379582	rs110689426	intergenic_variant	NA	NA
BovineHD1100014505			49402240	rs110152399	intergenic_variant	NA	NA
BovineHD1100014506			49406971	rs109462367	intergenic_variant	NA	NA
BovineHD1100014507			49410666	rs133784623	intergenic_variant	NA	NA
BovineHD1100014551			49547471	rs109483812	intergenic_variant	NA	NA
BovineHD1100014552			49554010	rs111007639	intergenic_variant	NA	NA
BovineHD1100014553			49554718	rs110397511	intergenic_variant	NA	NA
BovineHD1100014554			49557164	rs109069320	intergenic_variant	NA	NA
BovineHD1100014555			49558170	rs110349654	intergenic_variant	NA	NA
BovineHD1100014557			49568534	rs136658523	intergenic_variant	NA	NA
BovineHD1100014559			49573563	rs134260782	intergenic_variant	NA	NA
BovineHD1100014560			49575503	rs110777602	intergenic_variant	NA	NA
BovineHD1100014561			49578585	rs132654029	intergenic_variant	NA	NA
BovineHD1100014562			49581730	rs109102881	intergenic_variant	NA	NA
BovineHD1100014564			49586091	rs109977527	intergenic_variant	NA	NA
BovineHD1100014565			49592756	rs110937840	intergenic_variant	NA	NA
BovineHD1100014566			49599052	rs135356594	intergenic_variant	NA	NA
BovineHD1100014602			49707526	rs135263302	intergenic_variant	NA	NA
BovineHD1100014607			49721074	rs110647349	intergenic_variant	NA	NA
BovineHD1100014608			49726120	rs136195276	intergenic_variant	NA	NA
BovineHD1100014609			49730094	rs109616576	intergenic_variant	NA	NA
BovineHD1100014610			49741380	rs135480115	intergenic_variant	NA	NA
BovineHD1100014611			49749575	rs43010255	intergenic_variant	NA	NA
BovineHD1100014614			49767297	rs110195021	intergenic_variant	NA	NA
BovineHD1100014615			49769791	rs109765304	intergenic_variant	NA	NA
BovineHD1100014616			49770658	rs109444591	intergenic_variant	NA	NA
BovineHD1100014628			49829319	rs42681730	intergenic_variant	NA	NA
BovineHD1100014629			49834651	rs137538389	intergenic_variant	NA	NA
BovineHD1100014630			49839387	rs133511333	intergenic_variant	NA	NA
BovineHD1100014631			49843204	rs42682538	intergenic_variant	NA	NA
BovineHD1100017507			61703410	rs110155856	intergenic_variant	NA	NA
BovineHD1100017508			61704552	rs109100610	intergenic_variant	NA	NA
BovineHD1100017511			61728980	rs135533197	intergenic_variant	NA	NA
BovineHD1100017512			61731525	rs133058897	intergenic_variant	NA	NA
BovineHD1100017513			61744074	rs110123996	intergenic_variant	NA	NA
BovineHD1100017514			61749799	rs135655570	intergenic_variant	NA	NA
BovineHD1100031286			61734014	rs137230134	intergenic_variant	NA	NA
BovineHD1100031619			49414284	rs134671507	intergenic_variant	NA	NA
BovineHD1200008687			29453657	rs133804287	intergenic_variant	NA	NA
BovineHD1200008688			29466890	rs137423574	intergenic_variant	NA	NA
BovineHD1200008689			29470314	rs135991576	intergenic_variant	NA	NA
BovineHD1200008690			29481076	rs133971503	intergenic_variant	NA	NA
BovineHD1200008691			29487878	rs135205949	intergenic_variant	NA	NA
BovineHD1200008692			29493500	rs132858883	intergenic_variant	NA	NA
BovineHD1200008693			29499088	rs134098710	intergenic_variant	NA	NA
BovineHD1200008695			29515794	rs136670930	intergenic_variant	NA	NA
BovineHD1200008696			29530417	rs109107516	intergenic_variant	NA	NA
BovineHD1200008697			29533587	rs137578729	intergenic_variant	NA	NA
BovineHD1200008698			29538878	rs133272760	intergenic_variant	NA	NA
BovineHD1200008699			29542838	rs110391089	intergenic_variant	NA	NA
BovineHD1200008700			29548396	rs136340475	intergenic_variant	NA	NA
BovineHD1200020538			74014764	rs133375380	intergenic_variant	NA	NA
BovineHD1200020540			74018916	rs110486569	intergenic_variant	NA	NA
BovineHD1200020562			74098496	rs136774030	intergenic_variant	NA	NA
BovineHD1200020565			74111618	rs109103851	intergenic_variant	NA	NA
BovineHD1200026865			29463245	rs132982104	intergenic_variant	NA	NA
BovineHD1300016614			57918658	rs110228205	intergenic_variant	NA	NA
BovineHD1300016615			57938293	rs136624634	intergenic_variant	NA	NA
BovineHD1300016623			58004725	rs133437487	intergenic_variant	NA	NA
BovineHD1300016642			58058924	rs43101486	intergenic_variant	NA	NA
BovineHD1300016643			58063577	rs134704147	intergenic_variant	NA	NA
BovineHD1300016644			58066717	rs43101496	intergenic_variant	NA	NA
BovineHD1300016645			58070674	rs43101491	intergenic_variant	NA	NA
BovineHD1300016646			58075232	rs135000938	intergenic_variant	NA	NA
BovineHD1300016647			58078696	rs136453396	intergenic_variant	NA	NA
BovineHD1300016648			58084519	rs41694670	intergenic_variant	NA	NA
BovineHD1300016649			58085890	rs41694669	intergenic_variant	NA	NA
BovineHD1300016652			58103911	rs135190314	intergenic_variant	NA	NA
BovineHD1300016653			58106185	rs41694684	intergenic_variant	NA	NA
BovineHD1300016655			58115366	rs41694689	intergenic_variant	NA	NA
BovineHD1300016657			58125232	rs41694696	intergenic_variant	NA	NA
BovineHD1300016658			58126596	rs41694695	intergenic_variant	NA	NA
BovineHD1300016659			58131601	rs134348674	intergenic_variant	NA	NA
BovineHD1300016661			58137631	rs41694707	intergenic_variant	NA	NA
BovineHD1300016663			58145165	rs109409357	intergenic_variant	NA	NA
BovineHD1300016665			58150430	rs110576035	intergenic_variant	NA	NA
BovineHD1300016666			58157130	rs41695549	intergenic_variant	NA	NA
BovineHD1300016667			58160523	rs41695545	intergenic_variant	NA	NA
BovineHD1300016672			58172011	rs41695537	intergenic_variant	NA	NA
BovineHD1300016674			58179398	rs135892897	intergenic_variant	NA	NA
BovineHD1300016675			58182281	rs41695531	intergenic_variant	NA	NA
BovineHD1300016676			58199501	rs135325643	intergenic_variant	NA	NA
BovineHD1300016728			58402751	rs132921427	intergenic_variant	NA	NA
BovineHD1300016729			58407685	rs134410385	intergenic_variant	NA	NA
BovineHD1300016731			58426299	rs133243458	intergenic_variant	NA	NA
BovineHD1300016732			58428880	rs137123711	intergenic_variant	NA	NA
BovineHD1300016739			58452643	rs134899370	intergenic_variant	NA	NA
BovineHD1300016776			58594178	rs41699755	intergenic_variant	NA	NA
BovineHD1300016777			58599491	rs134171928	intergenic_variant	NA	NA
BovineHD1500013316			46754101	rs41660866	intergenic_variant	NA	NA
BovineHD1500013334			46776660	rs43170669	intergenic_variant	NA	NA
BovineHD1500013381			46922621	rs43042512	intergenic_variant	NA	NA
BovineHD1500013382			46927339	rs43042505	intergenic_variant	NA	NA
BovineHD1500013390			46946084	rs137152583	intergenic_variant	NA	NA
BovineHD1500025797			46935735	rs133972274	intergenic_variant	NA	NA
BovineHD1600020782			73159017	rs42834028	intergenic_variant	NA	NA
BovineHD1600020783			73160380	rs42834029	intergenic_variant	NA	NA
BovineHD1600020785			73163824	rs109630713	intergenic_variant	NA	NA
BovineHD1600020786			73165524	rs42835336	intergenic_variant	NA	NA
BovineHD1600020787			73176396	rs110962088	intergenic_variant	NA	NA
BovineHD1600020788			73179647	rs134295630	intergenic_variant	NA	NA
BovineHD1600020789			73191838	rs41826099	intergenic_variant	NA	NA
BovineHD1600020791			73199382	rs133148308	intergenic_variant	NA	NA
BovineHD2000000332			1053399	rs109375081	intergenic_variant	NA	NA
BovineHD2000000333			1054193	rs110663590	intergenic_variant	NA	NA
BovineHD2000000334			1058353	rs134350095	intergenic_variant	NA	NA
BovineHD2000000335			1071338	rs135511817	intergenic_variant	NA	NA
BovineHD2000000336			1077346	rs133290629	intergenic_variant	NA	NA
BovineHD2000000337			1086515	rs110602590	intergenic_variant	NA	NA
BovineHD2000000338			1090724	rs136282753	intergenic_variant	NA	NA
BovineHD2000000339			1097986	rs136816537	intergenic_variant	NA	NA
BovineHD2000000340			1106570	rs134743478	intergenic_variant	NA	NA
BovineHD2000000341			1110715	rs110274596	intergenic_variant	NA	NA
BovineHD2000000342			1111423	rs110270921	intergenic_variant	NA	NA
BovineHD2000000343			1115817	rs111009274	intergenic_variant	NA	NA
BovineHD2000000344			1122462	rs109729342	intergenic_variant	NA	NA
BovineHD2000000345			1126220	rs134037122	intergenic_variant	NA	NA
BovineHD2000000346			1136812	rs137389968	intergenic_variant	NA	NA
BovineHD2000000347			1141588	rs110209730	intergenic_variant	NA	NA
BovineHD2000000348			1142303	rs137175161	intergenic_variant	NA	NA
BovineHD2000021219			1067399	rs132905342	intergenic_variant	NA	NA
BovineHD2700001899			5919046	NA	NA	NA	NA
BovineHD2700001941			6189168	rs136436152	intergenic_variant	NA	NA
BovineHD2700001951			6243961	rs109189014	intergenic_variant	NA	NA
BovineHD2700001953			6249307	rs133098656	intergenic_variant	NA	NA
BovineHD2700013495			5915205	rs134531123	intergenic_variant	NA	NA
BovineHD2700013500			5973102	rs133397055	intergenic_variant	NA	NA
BovineHD4100003660			48274707	rs110533526	intergenic_variant	NA	NA
BovineHD4100003661			48325295	rs41590075	intergenic_variant	NA	NA
BovineHD4100003662			48350201	rs110699438	intergenic_variant	NA	NA
BovineHD4100003663			48384597	rs29003235	intergenic_variant	NA	NA
BovineHD4100003664			48418959	rs29003266	intergenic_variant	NA	NA
BovineHD4100003665			48426085	rs29002568	intergenic_variant	NA	NA
BovineHD4100003666			48472026	rs29003583	intergenic_variant	NA	NA
BovineHD4100008049			38284489	rs109489774	intergenic_variant	NA	NA
BovineHD4100008831			49702139	rs29013768	intergenic_variant	NA	NA
BovineHD4100008832			49745385	rs41631994	intergenic_variant	NA	NA
BovineHD4100009483			29523498	rs41591815	intergenic_variant	NA	NA
BTA-104617-no-rs			49824565	rs41569328	intergenic_variant	NA	NA
BTA-18236-no-rs			76507379	rs41624893	intergenic_variant	NA	NA
BTA-33000-no-rs			58099969	rs41585412	intergenic_variant	NA	NA
BTA-73516-no-rs			48752237	rs41657461	intergenic_variant	NA	NA
BTB-01838796			74787542	rs42949056	intergenic_variant	NA	NA
BTB-01891792			57536880	rs43001239	intergenic_variant	NA	NA
DIAS-93			48372520	rs110568735	intergenic_variant	NA	NA
Hapmap31835-BTA-161315			76281603	rs109631575	intergenic_variant	NA	NA
Hapmap38795-BTA-97039			48179532	rs41616215	intergenic_variant	NA	NA
Hapmap41074-BTA-73520			48351526	rs41657464	intergenic_variant	NA	NA
Hapmap48534-BTA-96124			49374782	rs41665726	intergenic_variant	NA	NA
INRA-566			57935031	rs109198458	intergenic_variant	NA	NA
UA-IFASA-4968			57559232	rs29023169	intergenic_variant	NA	NA
